# Supplementary material for: Identification of a p53 target, CD137L, that mediates growth suppression and immune response of osteosarcoma cells
Source: PubMed Central journal article supplement (PMC5587585; doi:10.1038/s41598-017-11208-x), 2017-09-06
Supplement: 41598_2017_11208_MOESM1_ESM.pdf [file 41598_2017_11208_MOESM1_ESM.pdf]

**Identification of a p53 target, *CDI37L*, that mediates growth suppression and immune response of osteosarcoma cells**

Yusuke Tsuda, Chizu Tanikawa, Takafumi Miyamoto, Makoto Hirata, Varalee Yodsurang, Yao-zhong Zhang, Seiya Imoto, Rui Yamaguchi, Satoru Miyano, Hiroshi Takayanagi, Hirotaka Kawano, Hidewaki Nakagawa, Sakae Tanaka, Koichi Matsuda

# Supplementary Figure 1.

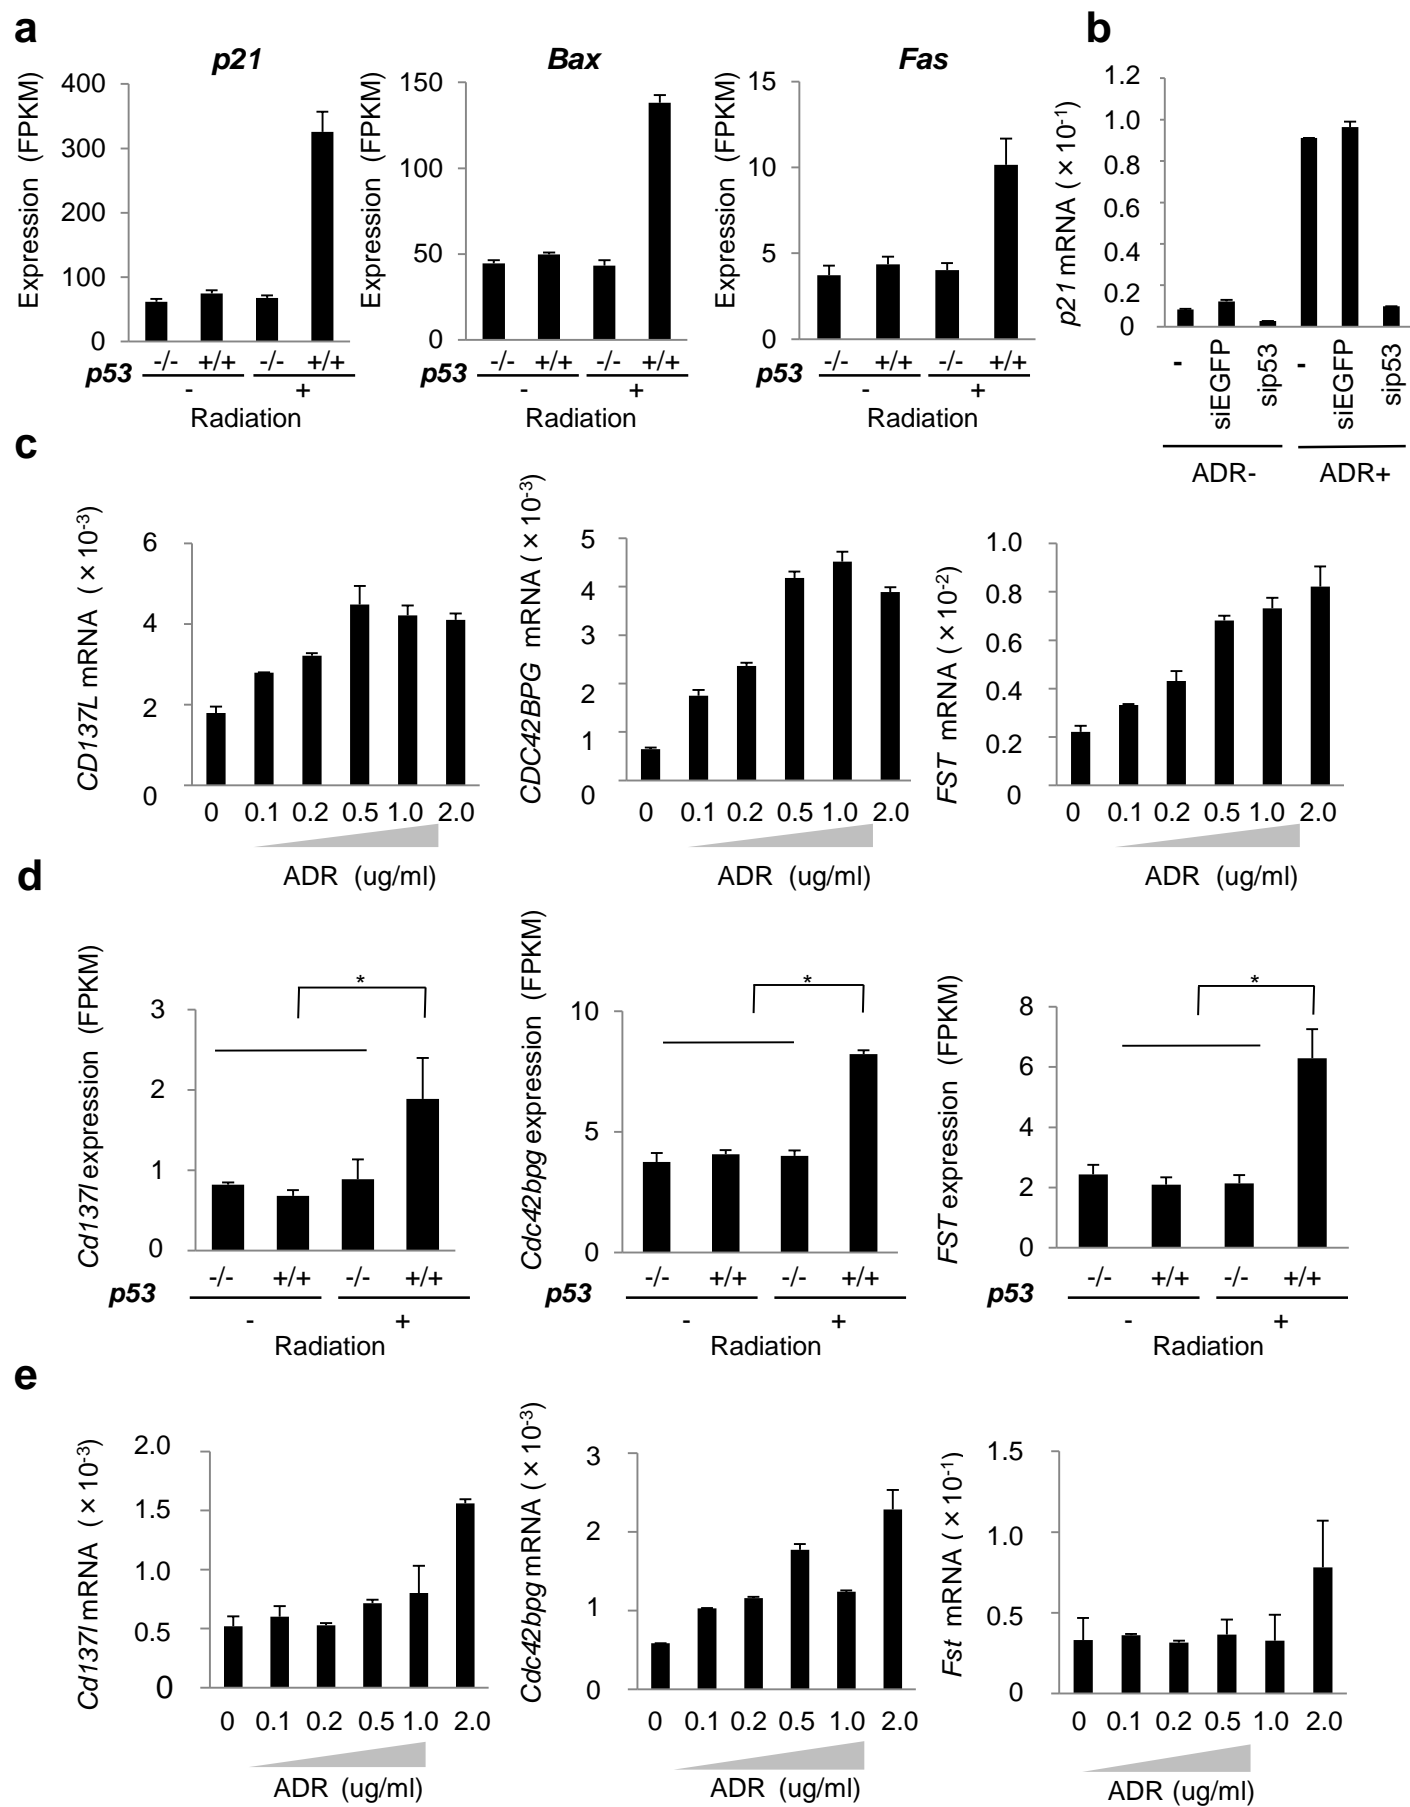

**Supplementary Figure 1.** Regulation of *CD137L*, *CDC42BPG* and *FST* by p53

(a) Expression of representative p53 target genes *p21*, *Bax* and *Fas* based on RNA sequencing data. Error bars represent SD (n = 3). (b) At 24 h after transfection with each siRNA, U2OS cells were treated with ADR (2  $\mu$ g/ml for 2 h). Then, 36 h after treatment, qPCR was performed. siRNA against *EGFP* was used as a control.  $\beta$ -actin was used for normalization of the expression levels. Error bars represent SD (n = 2). (c) qPCR in U2OS cells harvested 36 h after ADR treatment (0-2  $\mu$ g/ml for 2 h).  $\beta$ -actin was used for normalization of the expression levels. Error bars represent SD (n = 2). (d) *Cd137l*, *CDC42BPG* or *FST* expression from RNA sequencing data. FPKM, fragments per kilobase of exon per million mapped fragments. Error bars represent SD (n = 3). \*P < 0.05, Student's t-test. (e) qPCR in *p53*<sup>+/+</sup> calvarial osteoblasts harvested 36 h after ADR treatment (2  $\mu$ g/ml for 2 h).  $\beta$ -actin was used for normalization of the expression levels. Error bars represent SD (n = 3).

## Supplementary Figure 2.

**a**

Human

Consensus RRRCWWGYYYRRRCWWGYYY

CD137L-BS-A AcACTAGCCagtAACATtaCT

CD137L-BS-B GGGCAcGgTaAcGCATGaCT

Mouse

Consensus RRRCWWGYYYRRRCWWGYYY

Cd137I-BS GtGCATGCaCaTAcATGCag

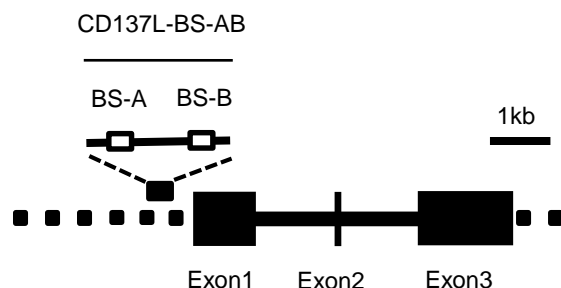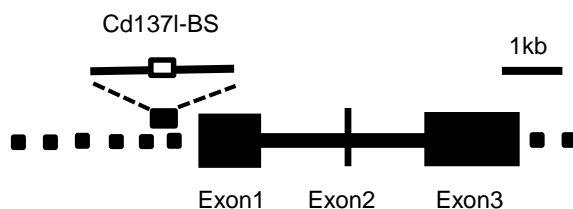

**b**

Human

Consensus RRRCWWGYYYRRRCWWGYYY

CDC42BPG-BS-A AGGCATGagCcAcCATGCCCC

CDC42BPG-BS-B AtGCCaGTCCcAGcCcTGCCCC

CDC42BPG-BS-C ctGCTTGCTctACTTGTC

Mouse

Consensus RRRCWWGYYYRRRCWWGYYY

Cdc42bpg-BS cAACTTGTCcctGctCcTGCCCC

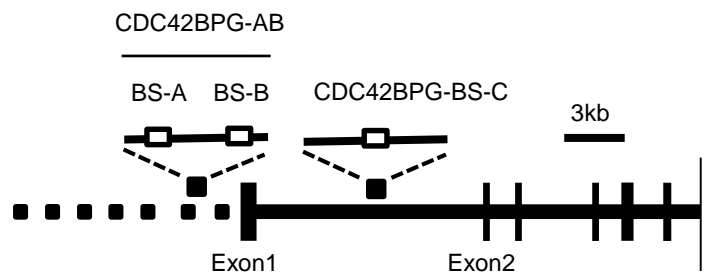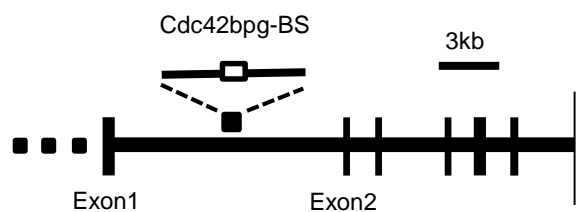

**c**

Human

Consensus RRRCWWGYYYRRRCWWGYYY

FST-BS1 GAACcAGTaTtGACcTGTgT

FST-BS2 GGACcTGCCcAGACATGTCC

Mouse

Consensus RRRCWWGYYYRRRCWWGYYY

Fst-BS cGACATGTaaAAACATcCgT

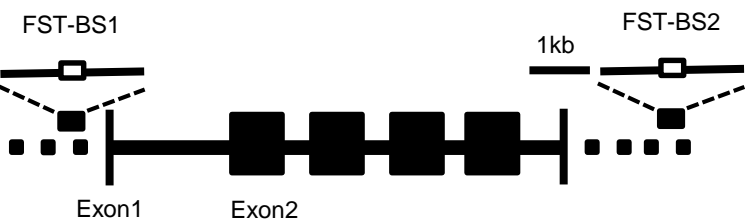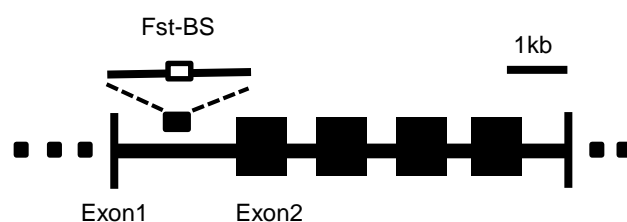

### Supplementary Figure 2. Genomic structures

(a)(b)(c) The genomic structures of the human (left) and mouse (mouse) *CD137L* (a), *CDC42BPG* (b) and *FST* (c) genes. White boxes represent the location of potential p53-binding sequences (p53BSs). R, purine; W, A or T; Y, pyrimidine. Nucleotides identical to the consensus sequence are written in capital letters.

**Supplementary Figure 3.**

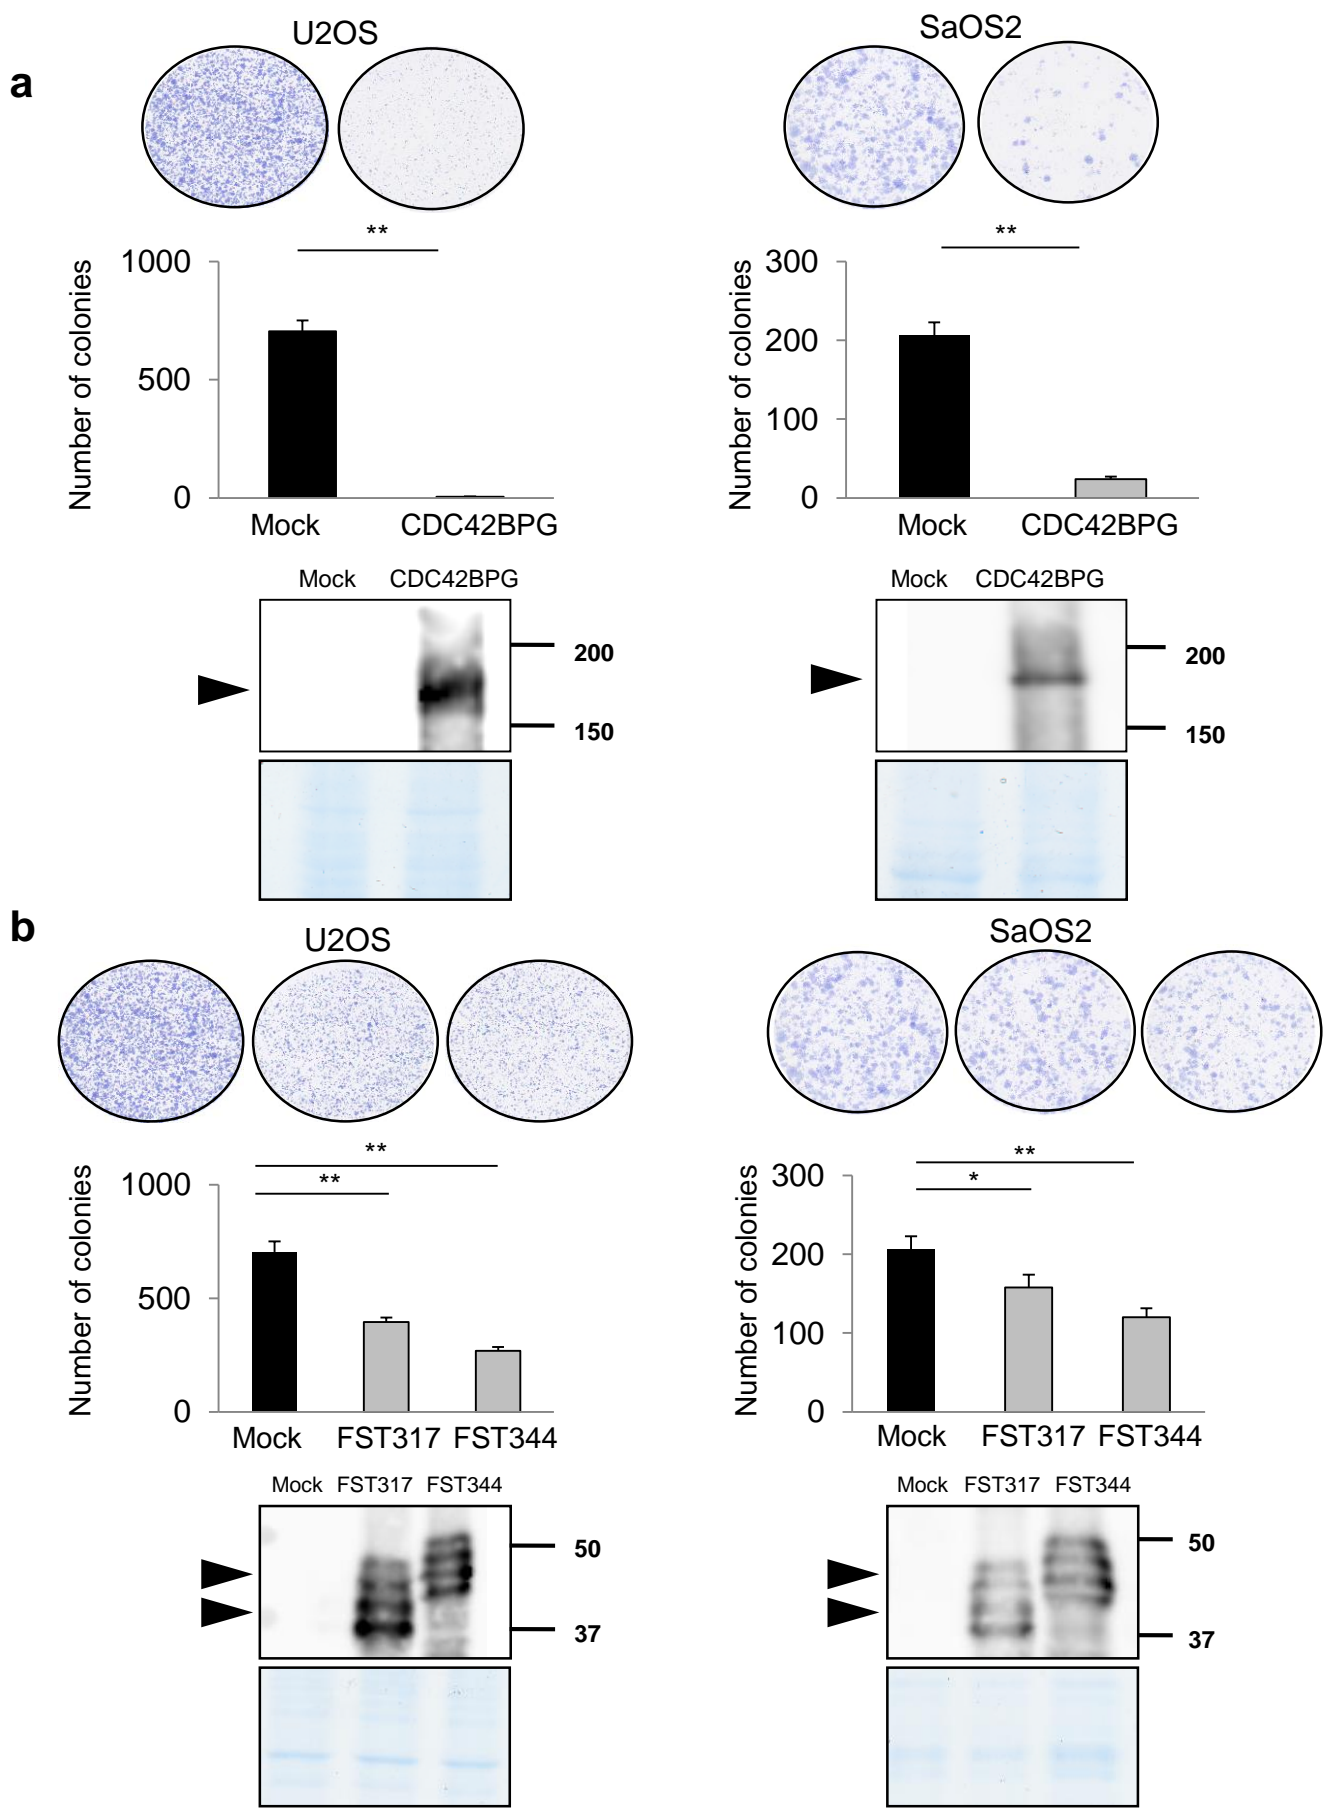

**Supplementary Figure 3.** Colony formation assay  
 (a)(b) A colony formation assay was performed. After ectopic expression of *CDC42BPG* (a), *FST* (b) or mock, the number of U2OS (left) or SaOS2 (right) colonies was determined. FST317 and FST344 are isoforms of FST. Whole cell extracts were subjected to western blotting with an anti-HA antibody. Coomassie Brilliant Blue staining was used as loading control.

**Supplementary Figure 4.**

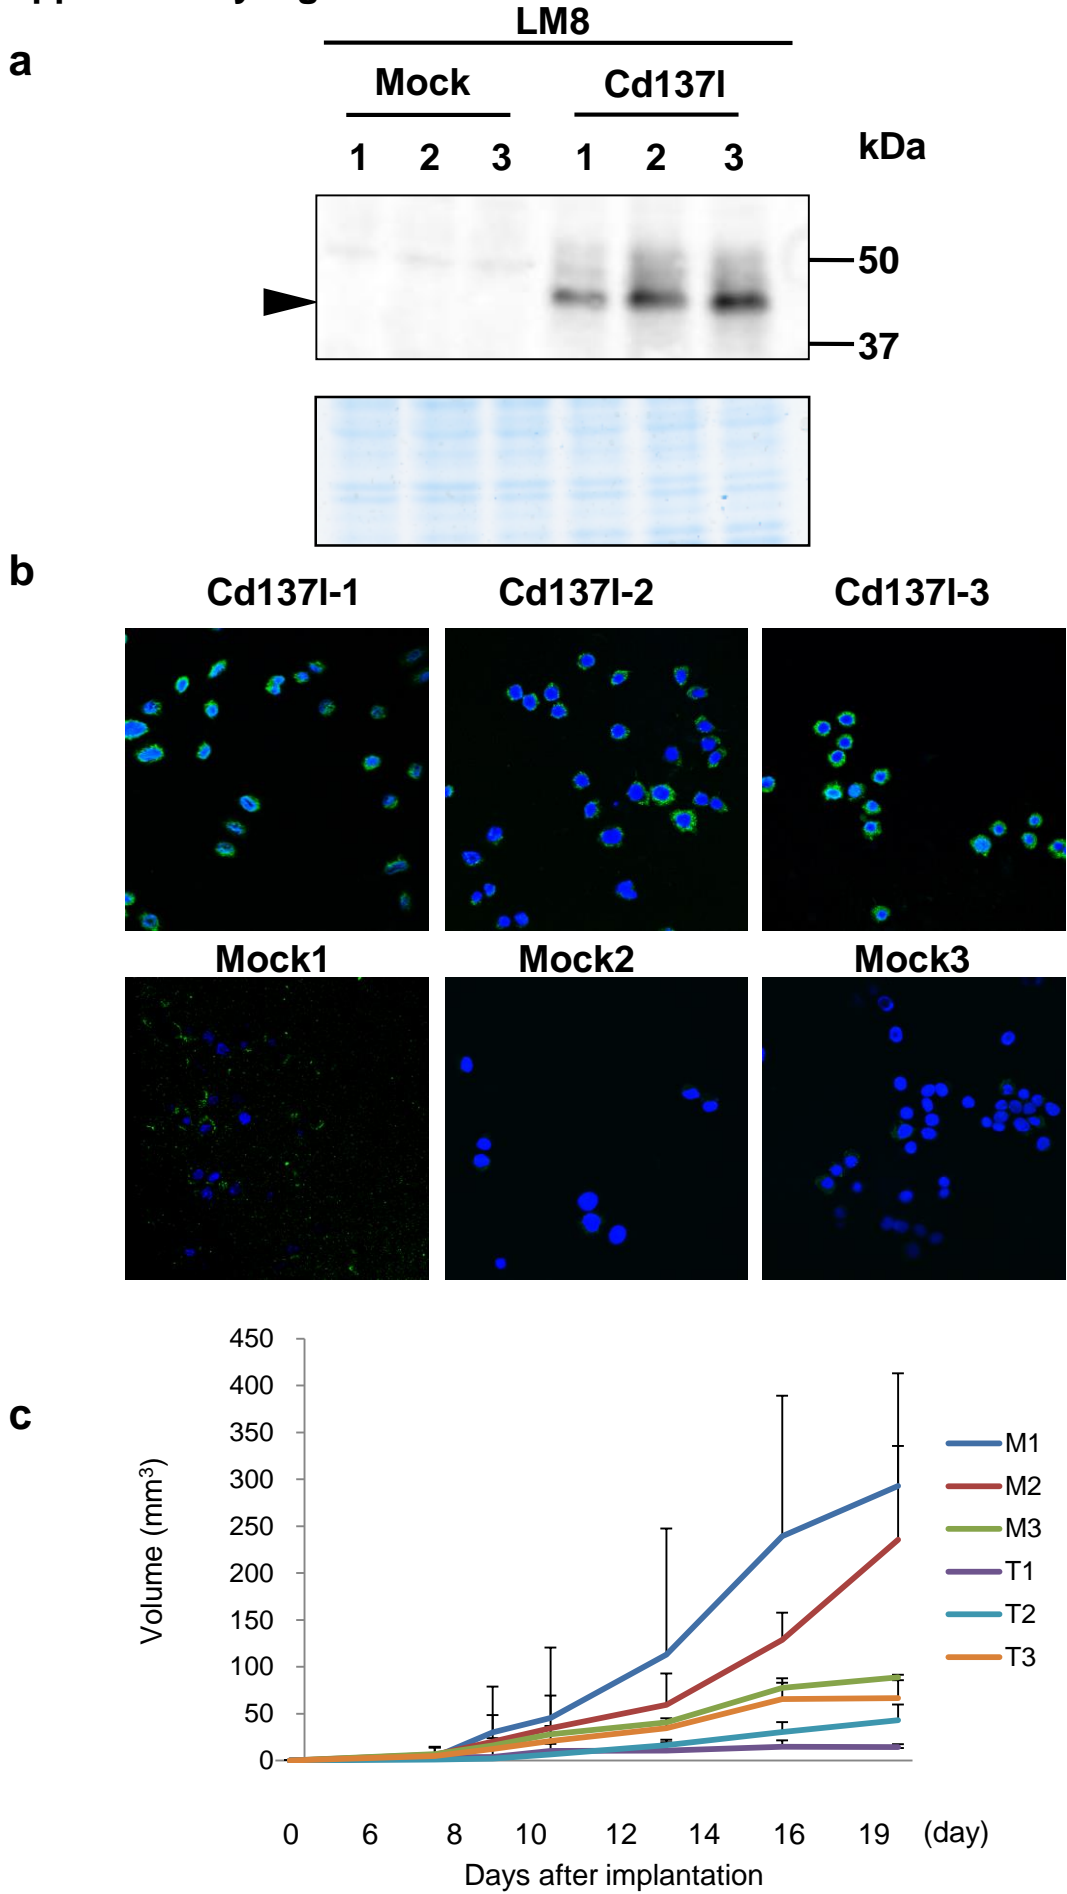

**Supplementary Figure 4.** Construction of stable cell lines and in vivo studies  
 (a) At 24 h after seeding, whole cell extracts were subjected to western blotting with an anti-Cd137I antibody. Coomassie Brilliant Blue staining was used as loading control. (b) Immunohistochemical staining for HA protein in Cd137I-expressing cells. (c) Cd137I (n = 3) or mock (n = 3) stable expression cell lines were inoculated into the left and right flanks of C3H mice; each group contains 2 mice. Tumor volume was calculated every 2 or 3 days.

# Supplementary Figure 5.

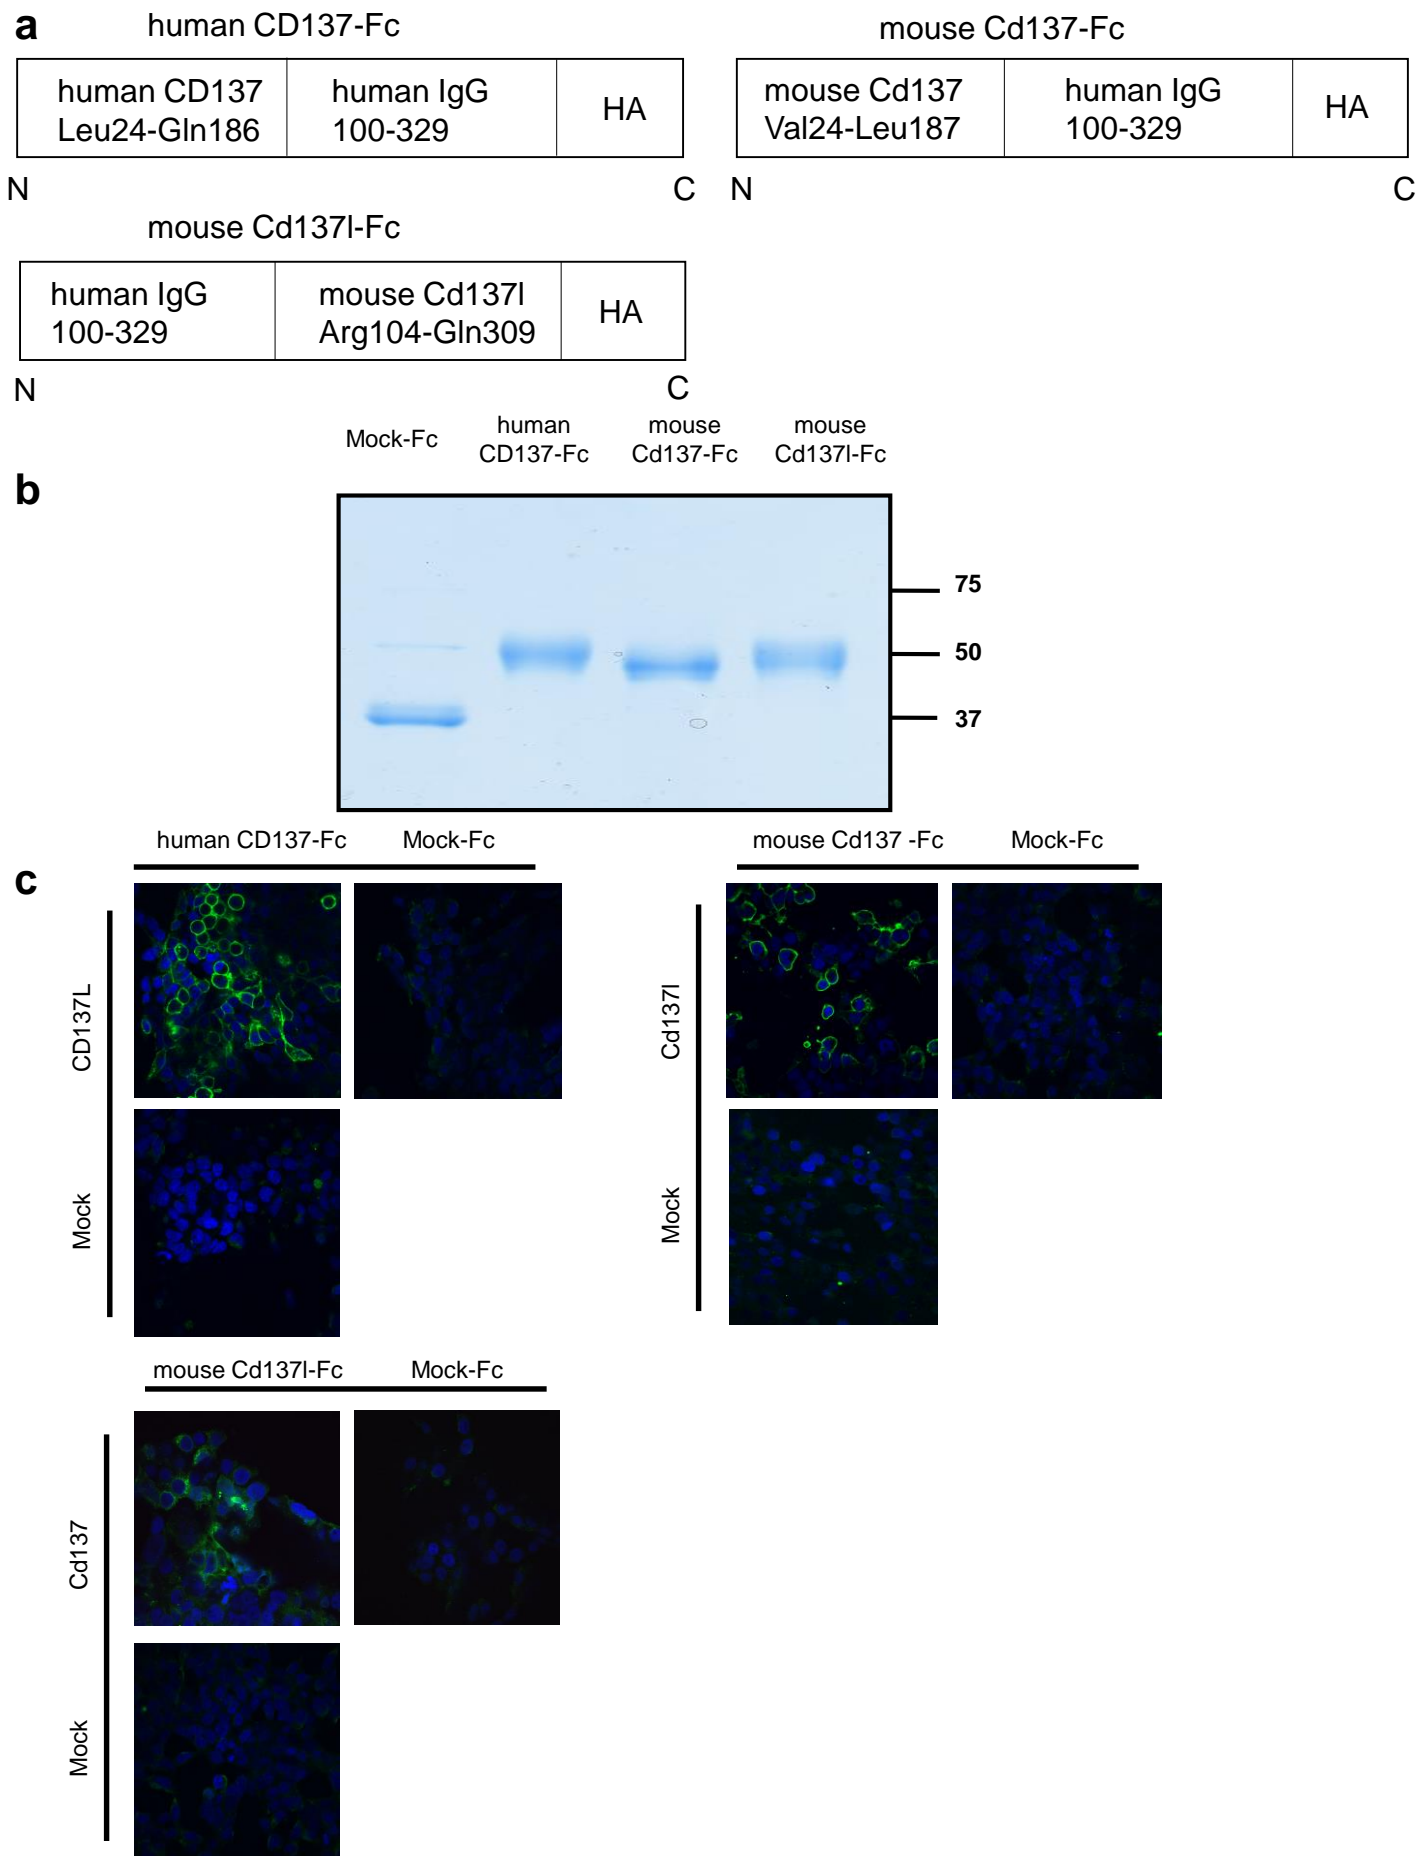

**Supplementary Figure 5.** Construction of recombinant proteins and in vivo studies

(a) The structures of recombinant proteins fused with the Fc fragment of IgG. Leu, Leucine; Gln, Glutamine; Val, Valine; Arg, Arginine. (b) Coomassie Brilliant Blue staining of recombinant proteins after purification. (c) After transfection with plasmid expressing CD137L or mock, the HEK293 cells were incubated with CD137-Fc (2 µg/ml) or mock-Fc (2 µg/ml) for 2 h. Immunohistochemical staining was performed using human IgG antibody to confirm binding ability in each recombinant protein. We also confirmed the interaction between Cd137 and Cd137I-Fc.

# Supplementary Figure 6.

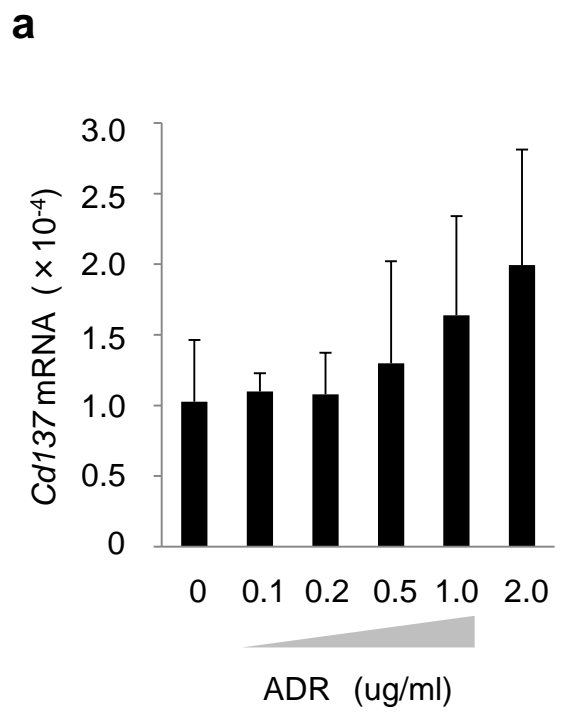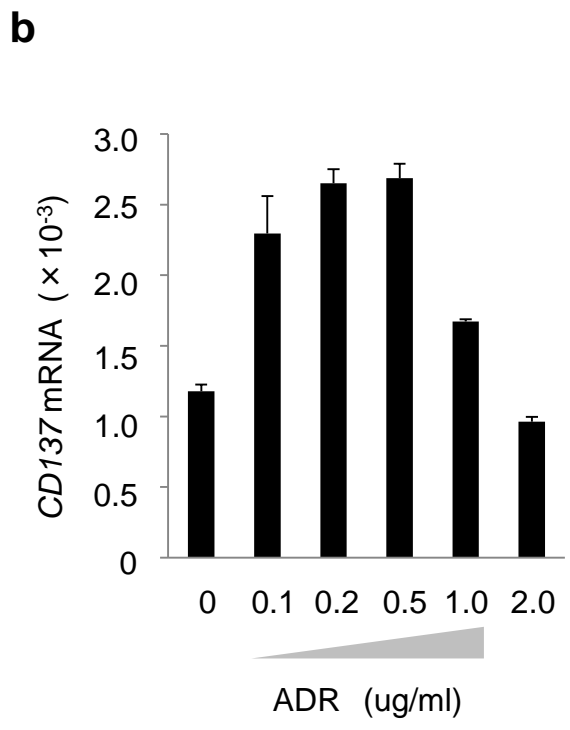

**Supplementary Figure 6.** Expression of CD137  
(a) qPCR of p53<sup>+/+</sup> osteoblasts harvested 36 h after ADR treatment (0-2  $\mu$ g/ml for 2 h).  $\beta$ -actin was used for normalization of the expression levels. Error bars represent SD (n = 2). (b) qPCR of U2OS cells harvested 36 h after ADR treatment (0-2  $\mu$ g/ml for 2 h).  $\beta$ -actin was used for normalization of the expression levels. Error bars represent SD (n = 2).

**Supplementary Figure 7.**

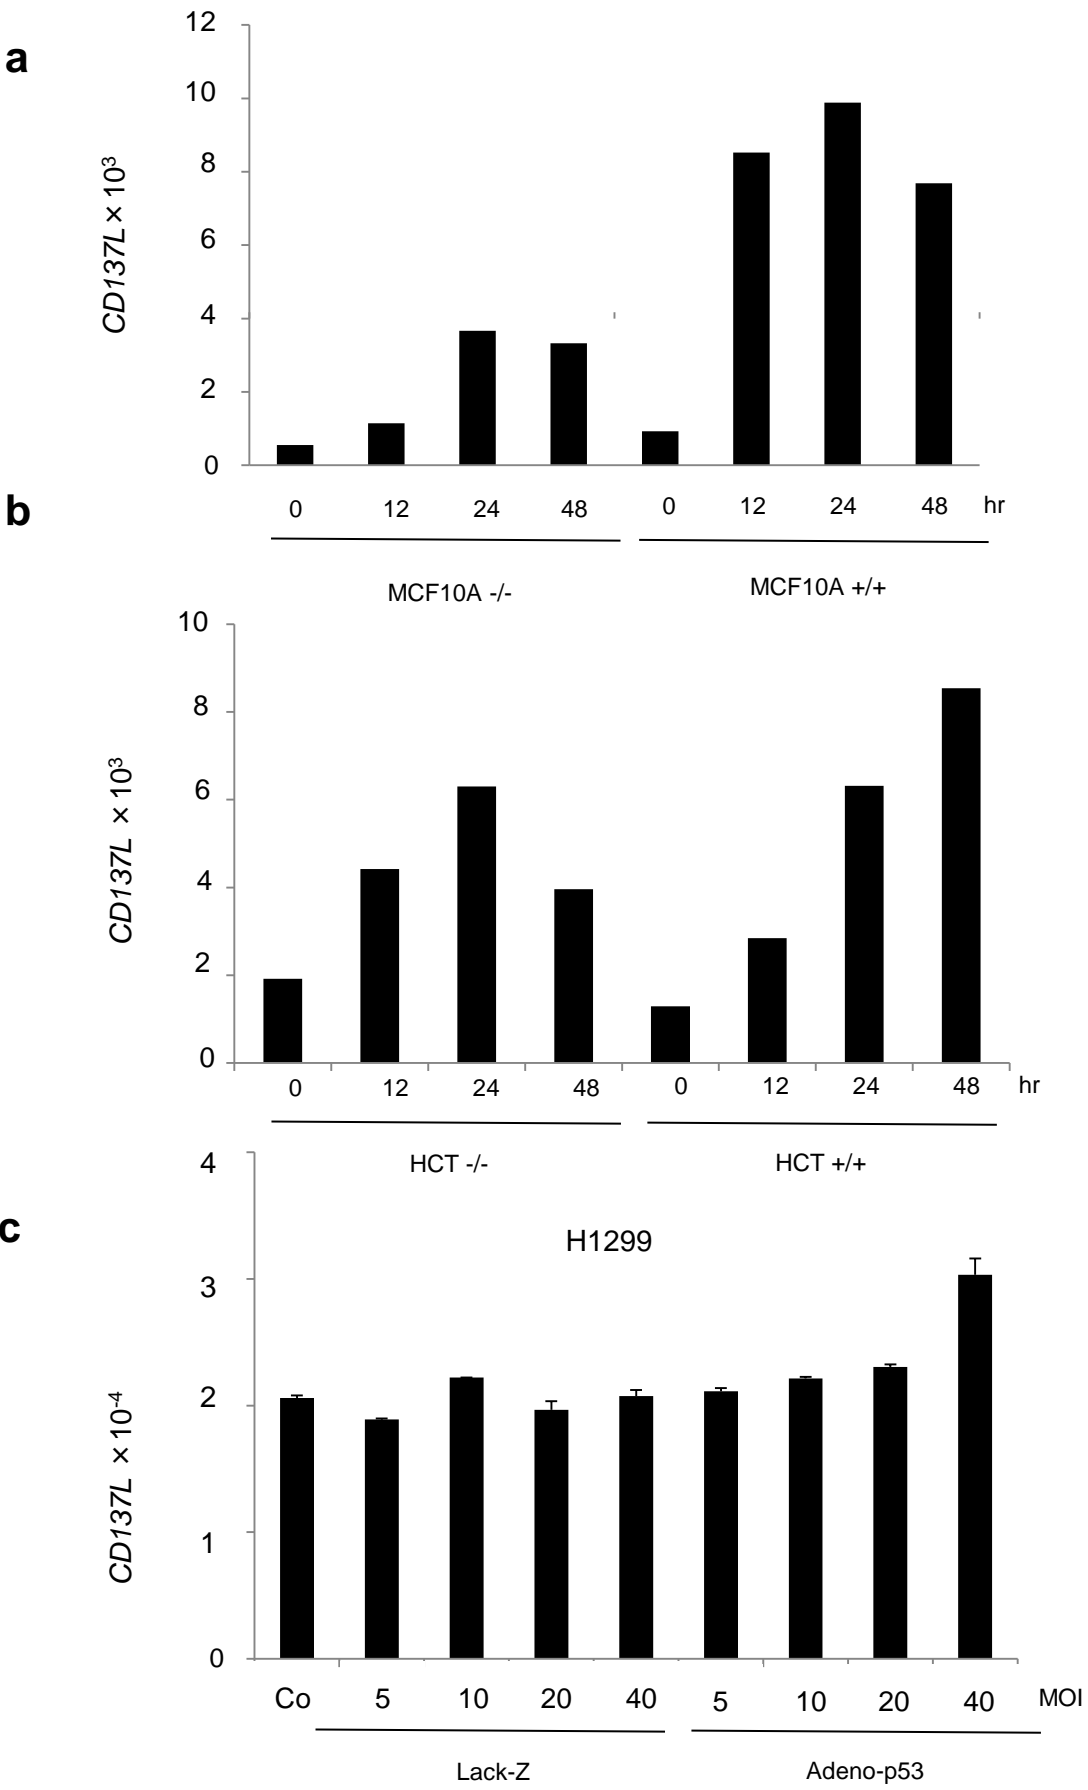

**Supplementary Figure 7. Expression of CD137**  
 (a) (b) Microarray analysis was performed after treatment with 2 µg/ml of adriamycin for 2. At 0 h, 12 h, 24 h and 48 h after ADR treatment, RNA was collected. (c) qPCR was performed after Lack-Z or Adeno-p53 infection (5-40MOI). β-actin was used for normalization of the expression levels. Error bars represent SD (n = 2).



## Supplementary Figure 8.

p53 binding regions in the *CD137L* gene ( $\pm 1$ kb)  
Ch19: 6530010-6536939 (GRCh37/hg19)

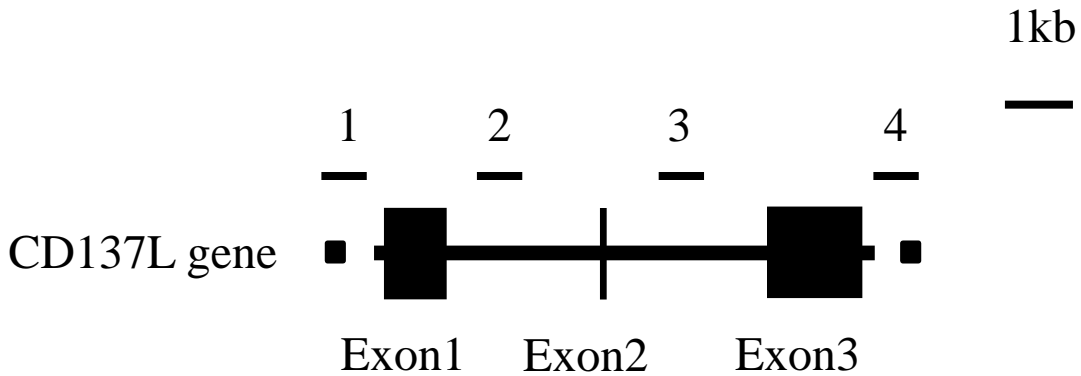

|   |       |            |         |         |
|---|-------|------------|---------|---------|
| 1 | chr19 | Promoter   | 6530921 | 6531665 |
| 2 | chr19 | Intron1    | 6532281 | 6532324 |
| 3 | chr19 | Intron2    | 6534452 | 6534634 |
| 4 | chr19 | Downstream | 6536671 | 6536767 |

**Supplementary Figure 8.** Remap database indicates four p53 binding regions in *CD137L* gene (within  $\pm 1$ kb, GRCh37/hg19)

**Supplementary Figure 9.**

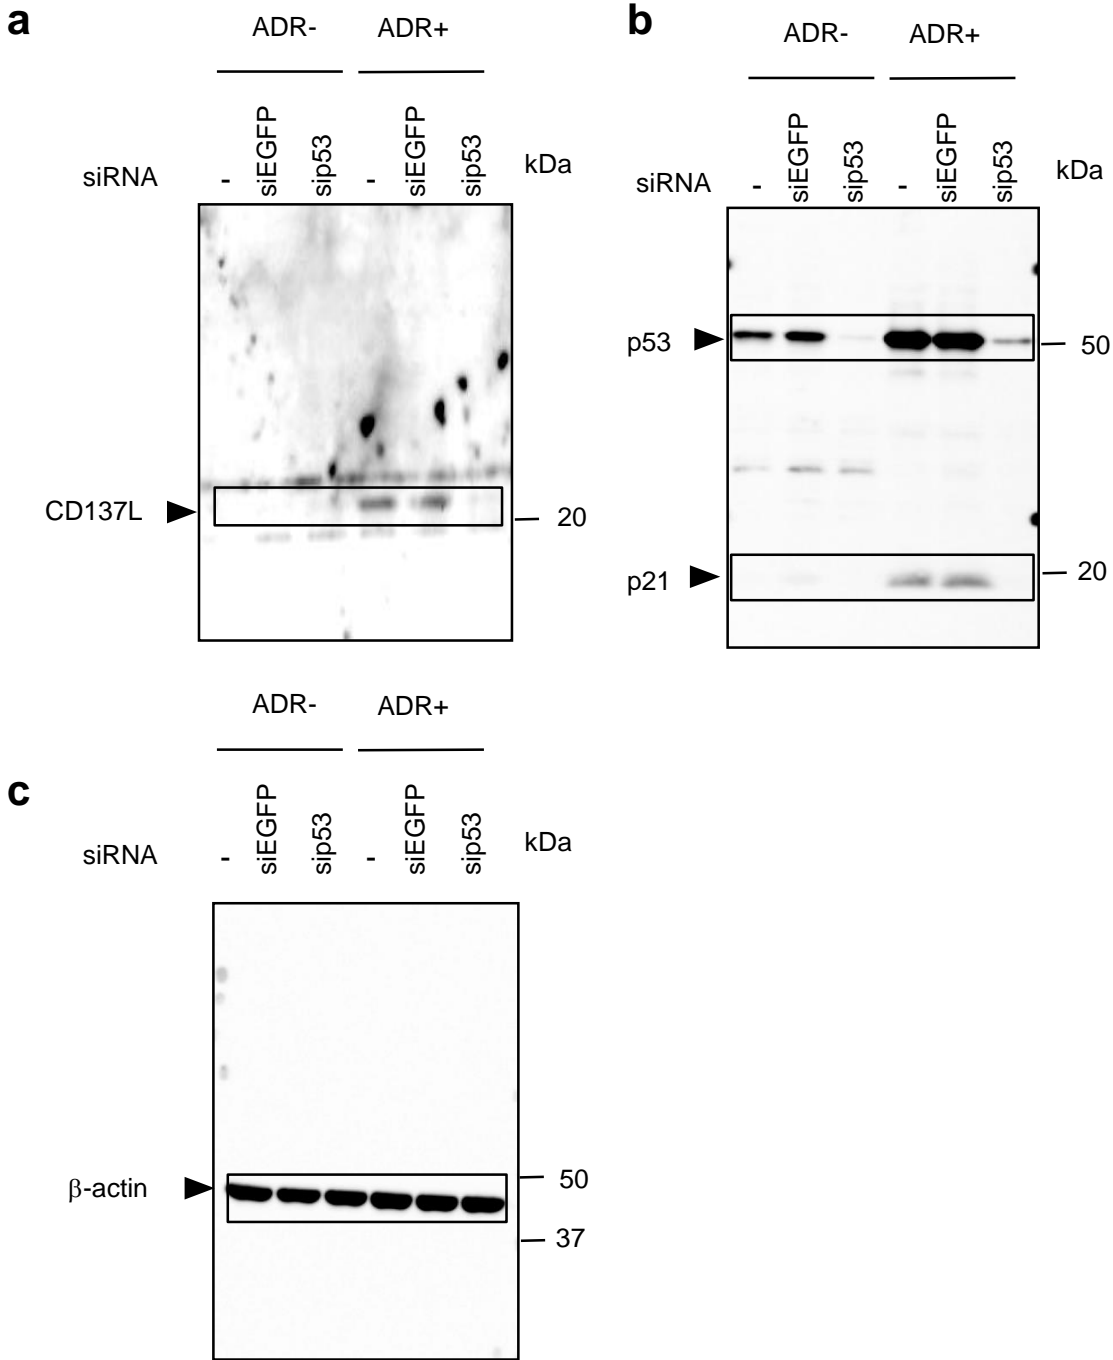

**Supplementary Figure 9.** Full-length gels and blots are shown in Figure 3b

Supplementary Table 1a. p53-induced gene list

| gene          | FPKM value |        |        |        |        | status |
|---------------|------------|--------|--------|--------|--------|--------|
|               | WX         | KX     | W      | K      | WX/max |        |
| Aen           | 35.15      | 7.68   | 8.84   | 7.32   | 3.98   | R      |
| A1414108      | 1.57       | 0.36   | 0.76   | 0.51   | 2.07   | M      |
| Ak1           | 79.91      | 32.19  | 32.61  | 33.52  | 2.38   | R      |
| Ano3          | 1.37       | 0.05   | 0.03   | 0.06   | 24.64  | N      |
| Anxa8         | 36.83      | 16.46  | 15.49  | 14.13  | 2.24   | N      |
| Ass1          | 11.15      | 3.46   | 2.28   | 2.63   | 3.22   | N      |
| Atp1a2        | 13.71      | 6.47   | 3.39   | 4.68   | 2.12   | N      |
| B230120H23Rik | 8.86       | 4.11   | 4.01   | 3.88   | 2.16   | M      |
| Bax           | 139.69     | 42.14  | 50.40  | 43.63  | 2.77   | R      |
| Bbc3          | 16.85      | 4.86   | 5.52   | 4.87   | 3.05   | R      |
| Cbln2         | 1.27       | 0.41   | 0.63   | 0.50   | 2.02   | N      |
| Ccng1         | 75.24      | 14.88  | 17.13  | 15.05  | 4.39   | R      |
| Cd80          | 2.00       | 0.64   | 0.51   | 0.41   | 3.14   | N      |
| Cd1371        | 1.76       | 0.81   | 0.72   | 0.81   | 2.17   | N      |
| Cdc42bpg      | 8.31       | 4.05   | 3.97   | 3.88   | 2.05   | N      |
| Cdkn1a        | 343.52     | 66.17  | 74.00  | 64.30  | 4.64   | R      |
| Celf5         | 5.47       | 0.94   | 1.68   | 1.14   | 3.25   | N      |
| Ces2e         | 2.25       | 0.63   | 0.63   | 0.54   | 3.57   | M      |
| Cox6b2        | 48.06      | 8.77   | 7.36   | 8.15   | 5.48   | N      |
| Cpt1c         | 27.30      | 9.44   | 11.19  | 10.20  | 2.44   | R      |
| Dcxr          | 41.06      | 6.28   | 6.28   | 5.57   | 6.54   | N      |
| Dynlrb2       | 1.31       | 0.17   | 0.09   | 0.62   | 2.13   | N      |
| Eda2r         | 5.71       | 0.13   | 0.25   | 0.22   | 22.60  | R      |
| Ephx1         | 73.75      | 6.92   | 9.36   | 8.42   | 7.88   | N      |
| Exoc4         | 17.97      | 4.26   | 5.22   | 4.05   | 3.44   | N      |
| Fam212b       | 8.10       | 0.53   | 1.46   | 1.22   | 5.56   | N      |
| Fas           | 9.32       | 4.00   | 4.37   | 3.99   | 2.13   | R      |
| Foxj1         | 1.72       | 0.31   | 0.54   | 0.72   | 2.38   | N      |
| Fst           | 6.16       | 2.13   | 2.01   | 2.30   | 2.67   | N      |
| Gas6          | 364.76     | 106.60 | 122.06 | 121.24 | 2.99   | N      |
| Gdf15         | 3.07       | 0.27   | 0.25   | 0.49   | 6.31   | R      |
| Gdf5          | 1.52       | 0.41   | 0.53   | 0.71   | 2.14   | N      |
| Gfap          | 13.30      | 1.35   | 3.26   | 2.14   | 4.08   | N      |
| Gm11974       | 19.70      | 7.27   | 8.98   | 8.32   | 2.19   | M      |
| Gria3         | 9.27       | 2.07   | 2.76   | 2.47   | 3.35   | N      |
| Inhbb         | 4.18       | 1.23   | 1.90   | 1.65   | 2.20   | N      |
| Lyve1         | 11.05      | 3.20   | 3.49   | 4.15   | 2.67   | N      |
| Mdm2          | 32.38      | 15.10  | 15.44  | 14.19  | 2.10   | R      |
| Mgmt          | 19.86      | 6.86   | 6.28   | 6.37   | 2.90   | R      |
| Mrap          | 4.22       | 0.83   | 0.87   | 1.25   | 3.38   | N      |
| Perp          | 8.48       | 2.65   | 3.54   | 3.91   | 2.17   | R      |
| Phlda3        | 90.31      | 18.02  | 23.24  | 19.30  | 3.89   | R      |
| Pmaip1        | 8.73       | 2.88   | 2.39   | 1.86   | 3.03   | R      |
| Polk          | 4.79       | 1.81   | 1.89   | 1.87   | 2.53   | R      |
| Pqlc3         | 27.80      | 12.27  | 12.74  | 10.70  | 2.18   | N      |
| Psrc1         | 29.63      | 7.09   | 5.53   | 4.77   | 4.18   | R      |
| Ptprv         | 16.15      | 7.26   | 7.25   | 7.43   | 2.17   | R      |
| Pvt1          | 2.63       | 1.17   | 1.00   | 0.89   | 2.25   | R      |
| Rnf169        | 6.01       | 2.72   | 2.85   | 2.91   | 2.07   | N      |
| Rprm          | 3.03       | 0.67   | 0.92   | 0.84   | 3.29   | R      |
| Rps271        | 222.32     | 95.94  | 103.78 | 96.33  | 2.14   | R      |
| Serpina3n     | 2.53       | 0.94   | 0.83   | 0.94   | 2.69   | M      |
| Sesn2         | 17.52      | 3.66   | 4.21   | 3.62   | 4.16   | R      |
| Slc19a2       | 7.75       | 1.19   | 1.73   | 1.35   | 4.49   | R      |
| Slc2a9        | 2.73       | 0.64   | 0.61   | 0.65   | 4.23   | R      |
| Slco1c1       | 3.56       | 0.46   | 0.77   | 0.84   | 4.25   | N      |
| Svop          | 1.44       | 0.01   | 0.39   | 0.23   | 3.67   | N      |
| Syna          | 1.24       | 0.48   | 0.31   | 0.33   | 2.61   | M      |
| Tnfrsf10b     | 9.93       | 2.95   | 3.04   | 2.91   | 3.27   | R      |
| Trim7         | 7.52       | 1.62   | 1.27   | 1.74   | 4.33   | N      |
| Trp53inp1     | 25.23      | 5.36   | 5.87   | 4.88   | 4.30   | R      |
| Upk1b         | 2.42       | 0.27   | 0.19   | 0.38   | 6.43   | N      |
| Vnn1          | 1.67       | 0.44   | 0.38   | 0.55   | 3.04   | N      |
| Zfp365        | 5.47       | 1.72   | 1.91   | 1.55   | 2.87   | R      |
| Zmat3         | 15.04      | 3.06   | 3.82   | 3.15   | 3.94   | R      |
| 1700003M07Rik | 1.32       | 0.37   | 0.59   | 0.51   | 2.25   | M      |
| 1700007K13Rik | 3.76       | 0.05   | 0.29   | 0.23   | 13.01  | M      |
| 2010001M06Rik | 10.09      | 1.03   | 2.00   | 1.84   | 5.06   | M      |
| 9030617O03Rik | 11.29      | 2.76   | 3.29   | 2.68   | 3.43   | M      |

FPKM, fragments per kilobase of exon per million mapped fragments

WX: irradiated  $p53^{+/+}$  group, KX: irradiated  $p53^{-/-}$  mice group, W: non-irradiated  $p53^{+/+}$  group, K: non-irradiated  $p53^{-/-}$  group. WX/max is median of WX / maximum value in median K, median KX or median W.

R, reported gene as p53 target, N, non-reported gene as p53 target, M, mouse genes which don't have human homologu.

Supplementary Table 1b. p53-repressed gene list

| gene     | FPKM value |       |       |       |        | status |
|----------|------------|-------|-------|-------|--------|--------|
|          | WX         | KX    | W     | K     | WX/max |        |
| Ankle1   | 1.07       | 4.59  | 3.11  | 3.05  | 0.35   | N      |
| Anln     | 1.23       | 5.02  | 3.27  | 3.58  | 0.38   | N      |
| Apitd1   | 1.37       | 3.08  | 3.67  | 3.01  | 0.45   | N      |
| Asf1b    | 1.95       | 10.43 | 7.53  | 7.02  | 0.28   | N      |
| Atad2    | 1.34       | 3.99  | 3.02  | 3.06  | 0.44   | N      |
| Aurkb    | 2.27       | 14.10 | 7.80  | 9.87  | 0.29   | N      |
| BC030867 | 0.43       | 2.41  | 1.23  | 1.47  | 0.35   | M      |
| Birc5    | 6.25       | 35.08 | 20.28 | 22.11 | 0.31   | K      |
| Bub1     | 0.75       | 3.99  | 2.14  | 2.42  | 0.35   | N      |
| Bub1b    | 2.22       | 8.43  | 5.06  | 5.47  | 0.44   | N      |
| Ccna2    | 5.40       | 26.62 | 16.43 | 17.42 | 0.33   | N      |
| Ccnb2    | 5.54       | 27.70 | 12.98 | 14.19 | 0.43   | N      |
| Ccne2    | 0.65       | 1.92  | 1.87  | 1.74  | 0.38   | N      |
| Ccr2     | 0.79       | 1.94  | 2.02  | 2.53  | 0.41   | N      |
| Cd79b    | 1.01       | 12.18 | 6.23  | 4.27  | 0.24   | N      |
| Cdc45    | 1.91       | 7.22  | 4.69  | 5.22  | 0.41   | N      |
| Cdc6     | 0.39       | 2.05  | 1.53  | 1.61  | 0.25   | N      |
| Cdca2    | 0.94       | 4.08  | 2.23  | 2.27  | 0.42   | N      |
| Cdca3    | 5.72       | 30.56 | 20.39 | 19.34 | 0.30   | N      |
| Cdca5    | 0.92       | 5.25  | 2.75  | 3.56  | 0.34   | N      |
| Cdca7    | 2.14       | 6.02  | 5.26  | 5.33  | 0.41   | N      |
| Cdca7l   | 0.67       | 2.43  | 1.99  | 2.03  | 0.33   | N      |
| Cdca8    | 4.13       | 18.56 | 10.12 | 11.95 | 0.41   | N      |
| Cdk1     | 4.57       | 19.31 | 9.90  | 10.90 | 0.46   | N      |
| Cdkn3    | 2.15       | 9.79  | 5.10  | 4.55  | 0.47   | N      |
| Cenpe    | 0.75       | 2.77  | 1.54  | 1.70  | 0.49   | N      |
| Cenpf    | 0.44       | 2.37  | 1.40  | 1.41  | 0.31   | N      |
| Cenph    | 1.41       | 5.88  | 3.22  | 4.03  | 0.44   | N      |
| Cenpi    | 0.82       | 2.89  | 1.84  | 1.96  | 0.44   | N      |
| Cenpk    | 1.55       | 4.67  | 3.50  | 3.59  | 0.44   | N      |
| Cenpm    | 1.24       | 5.52  | 4.00  | 4.42  | 0.31   | N      |
| Cenpn    | 1.82       | 5.94  | 3.90  | 4.34  | 0.47   | N      |
| Cenpp    | 1.11       | 4.86  | 3.27  | 3.44  | 0.34   | N      |
| Cep55    | 1.49       | 7.26  | 3.43  | 4.40  | 0.44   | N      |
| Chad     | 17.37      | 35.66 | 40.02 | 38.51 | 0.49   | N      |
| Chek1    | 1.01       | 2.83  | 2.11  | 2.17  | 0.48   | R      |
| Chtf18   | 1.12       | 3.31  | 2.29  | 2.76  | 0.49   | N      |
| Ckap2l   | 2.82       | 10.37 | 6.32  | 6.79  | 0.45   | N      |
| Clspn    | 0.50       | 2.81  | 1.90  | 2.01  | 0.27   | N      |
| Cybb     | 1.09       | 3.62  | 2.38  | 3.11  | 0.46   | N      |
| Depdc1a  | 0.95       | 4.97  | 2.82  | 3.26  | 0.34   | N      |
| Dhfr     | 0.96       | 2.72  | 2.08  | 2.21  | 0.46   | N      |
| Dlgap5   | 1.62       | 7.76  | 3.63  | 3.91  | 0.45   | N      |
| Dna2     | 0.59       | 1.54  | 1.21  | 1.38  | 0.49   | N      |
| Dscc1    | 0.37       | 1.82  | 1.18  | 1.61  | 0.31   | N      |
| E2f2     | 0.58       | 3.07  | 1.85  | 1.62  | 0.36   | N      |
| E2f8     | 0.78       | 3.97  | 3.06  | 2.86  | 0.27   | N      |
| Ect2     | 0.92       | 3.71  | 2.08  | 2.29  | 0.44   | N      |
| Esco2    | 0.40       | 2.57  | 2.17  | 2.26  | 0.18   | N      |
| Fam64a   | 3.76       | 13.57 | 9.54  | 10.56 | 0.39   | N      |
| Fbxo5    | 1.89       | 7.56  | 4.81  | 5.33  | 0.39   | N      |
| Figl1    | 1.17       | 4.28  | 3.18  | 3.46  | 0.37   | N      |
| Foxm1    | 2.40       | 8.85  | 6.00  | 6.30  | 0.40   | N      |
| Gins2    | 4.85       | 13.00 | 9.85  | 11.45 | 0.49   | N      |
| Gpha2    | 10.17      | 26.16 | 25.66 | 20.35 | 0.50   | N      |
| Gsg2     | 0.54       | 2.41  | 1.26  | 1.38  | 0.43   | N      |
| Hells    | 0.97       | 3.65  | 2.48  | 2.67  | 0.39   | N      |
| Hmgb2    | 12.97      | 43.96 | 37.27 | 32.87 | 0.39   | N      |
| Incenp   | 5.67       | 18.42 | 11.53 | 11.94 | 0.49   | N      |
| Iqgap3   | 0.56       | 3.02  | 2.28  | 2.48  | 0.25   | N      |
| Kif11    | 1.35       | 7.05  | 4.40  | 4.81  | 0.31   | N      |
| Kif15    | 0.46       | 2.98  | 1.97  | 2.06  | 0.23   | N      |
| Kif18a   | 0.65       | 2.05  | 1.60  | 1.37  | 0.47   | N      |
| Kif20b   | 0.52       | 2.16  | 1.24  | 1.39  | 0.42   | N      |
| Kif22    | 3.84       | 14.39 | 9.36  | 9.80  | 0.41   | N      |
| Kif23    | 1.72       | 7.99  | 4.79  | 5.09  | 0.36   | N      |
| Kif2c    | 1.86       | 8.10  | 3.95  | 4.83  | 0.47   | N      |
| Kif4     | 0.88       | 3.80  | 2.14  | 2.54  | 0.41   | N      |
| Lmnb1    | 7.19       | 23.94 | 17.09 | 18.85 | 0.42   | N      |
| Map4k1   | 0.57       | 2.28  | 1.34  | 1.18  | 0.49   | N      |
| Mcm10    | 0.79       | 3.44  | 1.94  | 2.11  | 0.41   | N      |
| Mcm2     | 4.28       | 14.37 | 10.15 | 11.26 | 0.42   | N      |
| Mcm3     | 5.06       | 18.28 | 12.70 | 13.30 | 0.40   | N      |
| Mcm5     | 3.50       | 15.25 | 9.45  | 10.67 | 0.37   | N      |

| gene          | FPKM value |       |       |       |        | status |
|---------------|------------|-------|-------|-------|--------|--------|
|               | WX         | KX    | W     | K     | WX/max |        |
| Mcm6          | 8.75       | 24.29 | 19.22 | 20.86 | 0.46   | N      |
| Melk          | 0.80       | 5.19  | 3.27  | 3.90  | 0.24   | N      |
| Mis18bp1      | 0.64       | 2.94  | 1.78  | 1.99  | 0.36   | N      |
| Mki67         | 1.89       | 12.20 | 8.92  | 7.99  | 0.24   | R      |
| Mns1          | 1.56       | 4.96  | 3.26  | 3.37  | 0.48   | N      |
| Mxd3          | 1.12       | 7.81  | 6.11  | 6.10  | 0.18   | N      |
| Mybl2         | 1.00       | 4.55  | 2.89  | 3.23  | 0.35   | N      |
| Napsa         | 0.77       | 5.17  | 2.14  | 2.62  | 0.36   | N      |
| Ncapg         | 0.63       | 3.25  | 2.06  | 2.46  | 0.31   | N      |
| Ncapg2        | 0.88       | 2.60  | 1.89  | 2.16  | 0.47   | N      |
| Ncaph         | 3.19       | 9.88  | 6.55  | 6.85  | 0.49   | N      |
| Ndc80         | 1.20       | 6.96  | 4.64  | 4.76  | 0.26   | N      |
| Neil3         | 1.25       | 6.67  | 4.58  | 4.60  | 0.27   | N      |
| Nek2          | 1.10       | 5.17  | 2.44  | 2.43  | 0.45   | N      |
| Ns1l          | 0.84       | 2.93  | 1.94  | 1.91  | 0.44   | N      |
| Nuf2          | 1.77       | 9.61  | 5.89  | 6.39  | 0.30   | N      |
| Nusap1        | 2.54       | 13.80 | 7.75  | 7.80  | 0.33   | N      |
| Oip5          | 0.59       | 2.71  | 1.68  | 1.78  | 0.35   | N      |
| Pbk           | 1.95       | 9.51  | 8.09  | 7.91  | 0.25   | N      |
| Plk1          | 3.60       | 16.23 | 8.36  | 9.19  | 0.43   | R      |
| Pole          | 0.48       | 2.05  | 1.32  | 1.55  | 0.36   | N      |
| Prc1          | 4.36       | 18.71 | 11.24 | 11.77 | 0.39   | N      |
| Prim1         | 2.88       | 9.11  | 6.77  | 8.20  | 0.43   | N      |
| Racgap1       | 4.82       | 19.10 | 11.62 | 13.16 | 0.41   | N      |
| Rad51         | 1.71       | 5.20  | 3.51  | 3.68  | 0.49   | N      |
| Rad51ap1      | 1.52       | 5.91  | 3.61  | 4.27  | 0.42   | N      |
| Rrm2          | 4.84       | 22.29 | 17.55 | 16.90 | 0.29   | N      |
| Sapcd2        | 0.39       | 1.77  | 1.09  | 1.22  | 0.36   | N      |
| Sgol1         | 0.64       | 3.03  | 1.63  | 1.78  | 0.39   | N      |
| Sgol2         | 0.70       | 2.88  | 1.54  | 1.65  | 0.45   | N      |
| Shcbp1        | 1.29       | 6.91  | 4.83  | 4.28  | 0.30   | N      |
| Ska1          | 0.33       | 1.77  | 1.25  | 1.29  | 0.27   | N      |
| Ska3          | 0.83       | 3.67  | 2.02  | 2.22  | 0.41   | N      |
| Smc2          | 1.52       | 5.15  | 3.93  | 3.67  | 0.42   | N      |
| Snora81       | 0.00       | 1.87  | 1.82  | 1.86  | 0.03   | N      |
| Spag5         | 1.45       | 5.84  | 3.05  | 3.51  | 0.48   | N      |
| Spc24         | 1.83       | 9.19  | 5.56  | 6.14  | 0.33   | N      |
| Spc25         | 3.04       | 10.43 | 7.02  | 7.86  | 0.43   | N      |
| Spdl1         | 1.01       | 3.29  | 2.19  | 2.38  | 0.46   | N      |
| Tcf19         | 5.84       | 17.81 | 15.21 | 17.29 | 0.38   | N      |
| Tk1           | 3.44       | 19.77 | 14.98 | 17.65 | 0.23   | N      |
| Top2a         | 4.44       | 21.32 | 12.51 | 13.25 | 0.36   | N      |
| Tpx2          | 3.14       | 13.18 | 7.40  | 7.94  | 0.42   | N      |
| Trip13        | 1.35       | 4.02  | 3.00  | 3.03  | 0.45   | N      |
| Ttk           | 0.94       | 3.56  | 2.54  | 2.31  | 0.41   | N      |
| Uhrf1         | 2.56       | 14.19 | 8.68  | 9.82  | 0.29   | N      |
| Vpreb3        | 0.13       | 10.44 | 5.31  | 3.64  | 0.04   | N      |
| Wdhd1         | 0.99       | 3.73  | 2.69  | 2.61  | 0.38   | N      |
| Xpnp2         | 0.71       | 1.63  | 1.74  | 1.60  | 0.44   | N      |
| 1190002F15Rik | 3.01       | 9.45  | 6.67  | 7.00  | 0.45   | N      |
| 2700099C18Rik | 1.47       | 5.75  | 3.68  | 3.59  | 0.41   | M      |
| 2810417H13Rik | 2.42       | 17.16 | 10.64 | 11.48 | 0.23   | M      |
| 4930579G24Rik | 1.88       | 4.55  | 3.92  | 4.04  | 0.48   | M      |

FPKM, fragments per kilobase of exon per million mapped fragments

WX, irradiated  $p53^{+/+}$  group, KX, irradiated  $p53^{-/-}$  mice group, W, non-irradiated  $p53^{+/+}$  group, K, non-irradiated  $p53^{-/-}$  group.

WX/min is median WX / minimum value of median K, median KX or median W.

R, reported gene as p53 target, N, non-reported gene as p53 target, M, mouse gene which don't have human homologue.

Supplementary Table 2. Primer sequence

|                            |                  | Forward                          | Reverse                             |                                |
|----------------------------|------------------|----------------------------------|-------------------------------------|--------------------------------|
| Quantitative real-time PCR | human CD137L     | TCAGGCTCCGTTTCACTTG              | CAGGTCCACGGTCAAAGC                  |                                |
|                            | human CD137      | CCTGAAGACCAAGGAGTGGGA            | GCAAAGCTGATTCCAAGAGAA               |                                |
|                            | human CDC42BPG   | AGATGCTGAAGAGGGCTGAG             | CCCCTTTCACGAGCACAT                  |                                |
|                            | human FST        | TCTGCCAGTTCATGGAGGA              | TCCTTGCTCAGTTCGGTCTT                |                                |
|                            | mouse Cd137l     | CGCCAAGCTACTGGCTAAAA             | CGTACCTCAGACCTTGAGATAGGT            |                                |
|                            | mouse Cd137      | TGAGCTTCTCTCCAGTACCA             | AGCAGCAAAGCCGATGTC                  |                                |
|                            | mouse Cdc42bpg   | GCCATTTGTTGGCTTCACTT             | GGGCAGCCATTAGCTCTG                  |                                |
|                            | mouse Fst        | AAGCATTCTGGATCTTGCAACT           | GATAGGAAAGCTGTAGTCCTGGTC            |                                |
|                            | p53 binding site | human CD137L-BS-AB               | AAAGGTACCTCCTTCAACACTAGCCAGTAACA    | AAAAAGCTTTGGAACTACAGGCACATACCA |
|                            |                  | mouse Cd137l-BS                  | AAAGGTACCTCAGTGGCTGAGAGCATTG        | AAAAAGCTTTGCTCTTAACTGCTGAACCA  |
| human CDC42BPG-BS-AB       |                  | AAAGGTACCCACCCAGGCTGATCTTGAAC    | AAAAAGCTTTGTGTGACCTCAGGCAAGTC       |                                |
| human CDC42BPG-BS-C        |                  | AAAGGTACCTGCCTGTGTTGTTGCACC      | AAAAAGCTTGGACAGGCTGCCTAATCCT        |                                |
| mouse Cdc42bpg-BS          |                  | AAAGGTACCTTCTCCCTGCCTGCCTCT      | AAAAAGCTTCCCTGCAGAAATATCAGAGGTGA    |                                |
| human FST-BS               |                  | AAACTCGAGAACAAAAATGAAAGGCGACA    | AAAAGATCTGCAGCTTGGTGTGTTGTTAGTG     |                                |
| mouse Fst-BS               |                  | AAAGGTACCCCTGCAGATTCATATTCATTCTC | AAAAAGCTTTTGCATTGACTTTTACTAGACTGTTT |                                |
| Expression vector          | human CD137L     | AAAGAATTCTCTCGTCATGGAATACGCC     | AAACTCGAGTTCCGACCTCGGTGAAGG         |                                |
|                            | mouse Cd137l     | AAAGAATTCACCGTGGTAATGGACCAGCAC   | AAACTCGAGTTCCCATGGGTTGTCGGGTTT      |                                |
|                            | human CDC42BPG   | AAAGGTACCATGGAGCGGCGCTGCGCGCG    | AAAAGATCTAGGAGAGCTCTCCAATTC         |                                |
|                            | human FST317     | AAAGGTACCCCCAGGATGGTCCGC         | AAACTCGAGGTTGCAAGATCCGGA            |                                |
|                            | human FST344     | AAAGGTACCCCCAGGATGGTCCGC         | AAACTCGAGCCACTCTAGAATAGA            |                                |
| Recombinant protein        | human CD137      | AAAGGTACCCAGGATCCTTGTAGTAACTGC   | AAAGAGCTCGATCTGCGGAGAGTGTCTCTGG     |                                |
|                            | mouse Cd137      | AAAGGTACCCAGAACTCCTGTGATAACTGT   | AAAGAGCTCAGCTGCTCCAGTGGTCTTCTT      |                                |
|                            | mouse Cd137l     | AAAGAATTCACCGAGCCTCGGCCAGCGCTC   | AAACTCGAGTCATTCCCATGGGTTGTCGGG      |                                |
| Genotyping                 | mouse p53        | GTTATGCATCCATACAGTACA            | CCGAGGATTTACAGACACC                 |                                |
| CHIP assay                 | CD137L           | TCCTTCAACACTAGCCAG               | TCTCAGCACTGTGATGCC                  |                                |
|                            | CDC42BPG         | GGCCCTCTGTTGACAATCTC             | ACAGGCTGCCTAATCCTCTG                |                                |
|                            | FST              | GATGCCACAGAAAGCCTAT              | TGTCTGCTCCAAATCAGCAC                |                                |
| siRNA                      |                  | Sence                            | Antisense                           |                                |
|                            | siP53            | GACUCCAGUGGUAAUCUACTT            | AGUAGAUAUACCACUGGAGUCTT             |                                |
|                            | siEGFP           | GCAGCACGACUUCUUAAGT              | CUUGAAGAAGUCGUGCUGC                 |                                |
